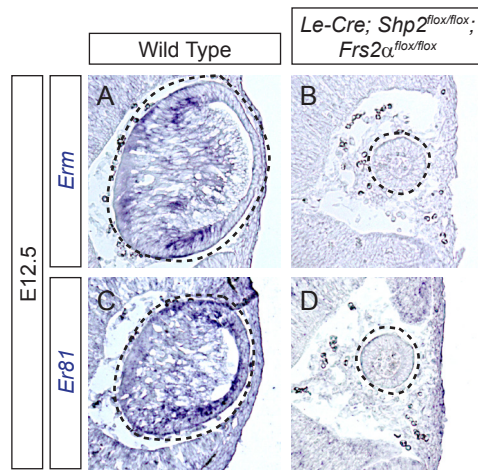

**Supplementary Figure 1. (A-D)** RNA in situ hybridization shows that FGF signaling-response genes *Erm* and *Er81* were down regulated in E12.5 *Le-Cre; Shp2<sup>flox/flox</sup>; Frs2α<sup>flox/flox</sup>* lens. Three embryos of each genotype were analyzed. Dashed lines encircled lenses.

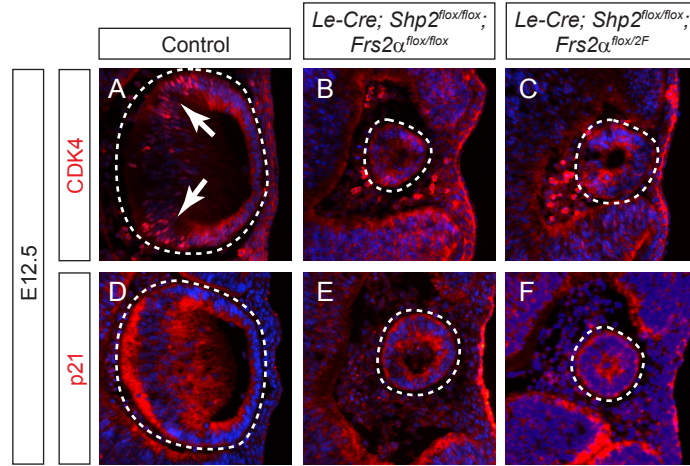

**Supplementary Figure 2.** (A-C) Nuclear staining of cyclin-dependent kinase 4 (CDK4) was detected in wild type lens cells that migrated to the transitional zone to proliferate (arrows in A), but not in either *Le-Cre; Shp2<sup>flox/flox</sup>, Frs2α<sup>flox/flox</sup>* or *Le-Cre; Shp2<sup>flox/flox</sup>, Frs2α<sup>flox/2F</sup>* mutant cells. (D-F) Staining of cell cycle arrest marker p21 was indistinguishable between control and mutant lenses.

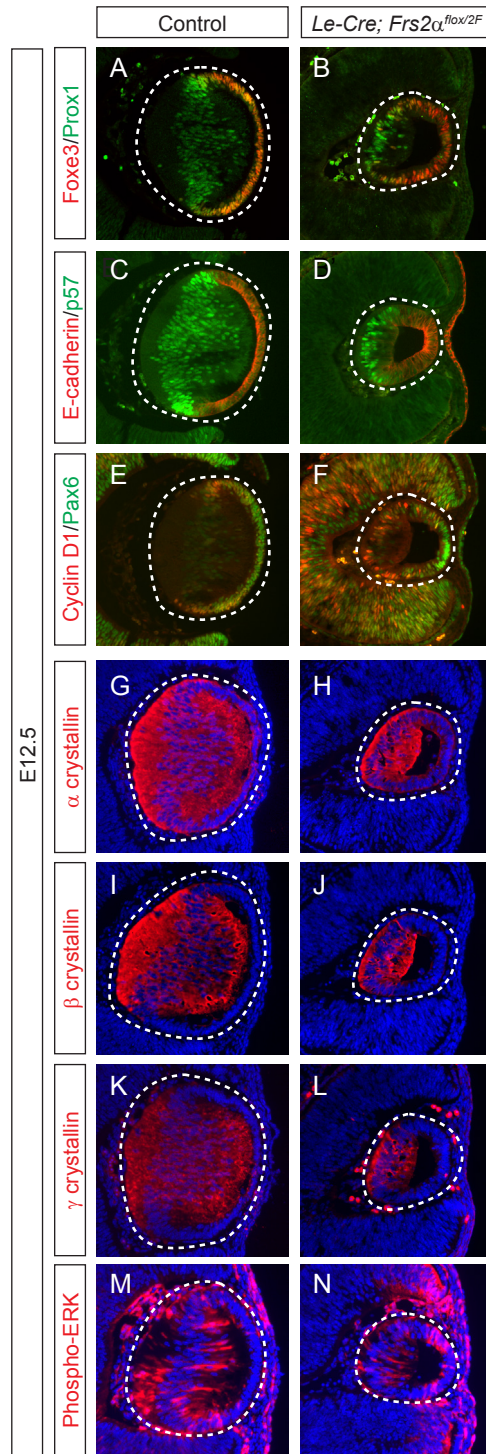

**Supplementary Figure 3.** (A-F) Similar to *Le-Cre; Frs2 $\alpha^{lox/lox}$*  mutant, *Le-Cre; Frs2 $\alpha^{lox/2F}$*  lens was reduced in size at E12.5, but displayed normal expression of Foxe3, Prox1, E-cadherin, p57, cyclin D1 and Pax6. (G-L)  $\alpha$ -,  $\beta$ - and  $\gamma$ -crystallins were also present in *Le-Cre; Frs2 $\alpha^{lox/2F}$*  lens. (M-N) Similar Phospho-ERK staining was observed in wild type control and *Le-Cre; Frs2 $\alpha^{lox/2F}$*  lenses. Three embryos of each genotype were analyzed.

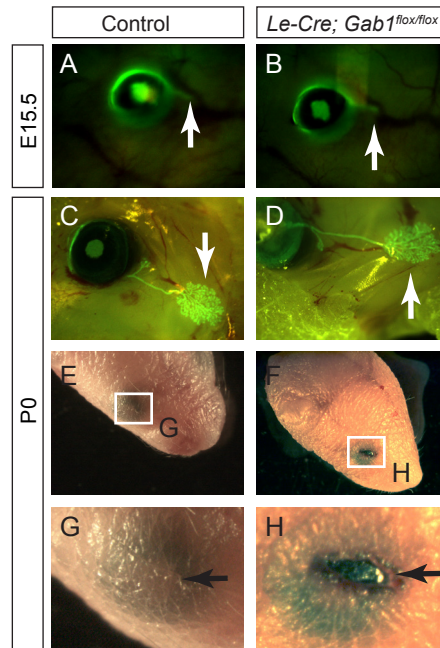

**Supplementary Figure 4.** (A-D) As visualized by GFP expression from *Le-Cre* transgene (Pan et al., 2008), both budding and branching morphogenesis of lacrimal gland were unaffected in E16.5 and P0 *Le-Cre; Gab1<sup>flox/flox</sup>* mutants ( $n=10$ ), respectively. (E-H) Open eyelids (arrows in G and H) were observed in P0 *Le-Cre; Gab1<sup>flox/flox</sup>* mutants ( $n=10$ ).

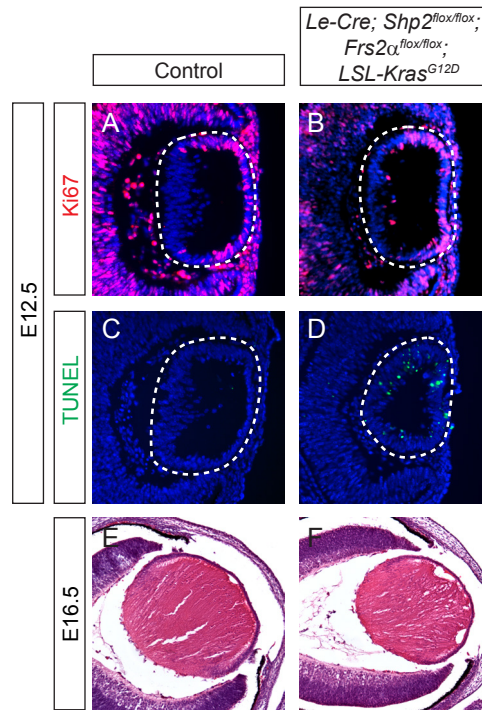

**Supplementary Figure 5. (A-D)** Expression of cell proliferation marker Ki67 was recovered in E12.5 *Le-Cre; Shp2<sup>flox/flox</sup>; Frs2α<sup>flox/flox</sup>; LSL-Kras<sup>G12D</sup>* mutant lenses. However, TUNEL staining remained significantly elevated as compared to controls. **(E-F)** At E16.5, *Le-Cre; Shp2<sup>flox/flox</sup>; Frs2α<sup>flox/flox</sup>; LSL-Kras<sup>G12D</sup>* mutant ( $n=3$ ) lenses was smaller in size, but morphologically similar to wild type controls.
